# Supplementary material for: High-efficiency omnidirectional photoresponses based on monolayer lateral p–n heterojunctions
Source: Royal Society of Chemistry journal article supplement (doi:10.1039/c6nh00075d), 2016-10-28
Supplement: c6nh00075d1.pdf [file c6nh00075d1.pdf]

## Supporting Information to

### High-Efficiency Omnidirectional Photoresponses Based on Monolayer Lateral p-n Heterojunction

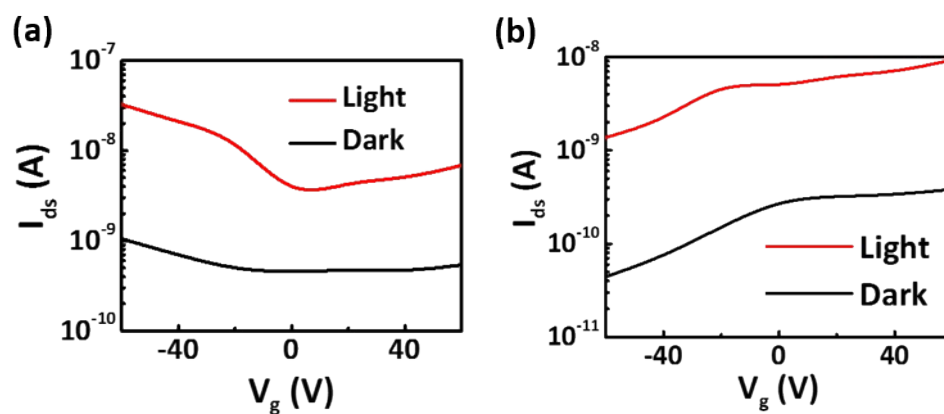

**Fig. S1.**  $I_{ds}$ - $V_g$  characteristics.  $I_{ds}$ - $V_g$  characteristics of the device under dark and 532 nm laser illumination at  $V_{ds}$  of (a) 2 V and (b) -2 V.

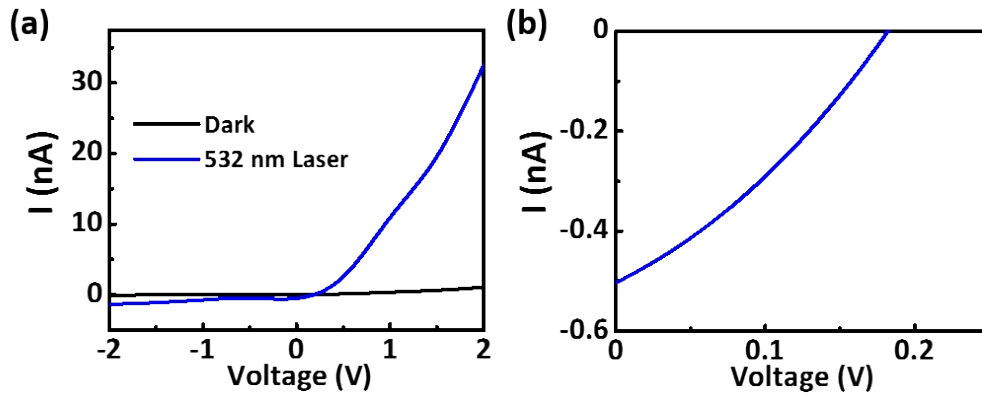

**Fig. S2.** Photoreponse of the WSe<sub>2</sub>-MoS<sub>2</sub> monolayer device under  $V_g$  of -60 V. (a) I-V characteristics of the device in the dark and under 532 nm laser illumination from  $V_d = -2$  V to 2 V. (b) Photovoltaic characteristics under 532 nm laser illumination.

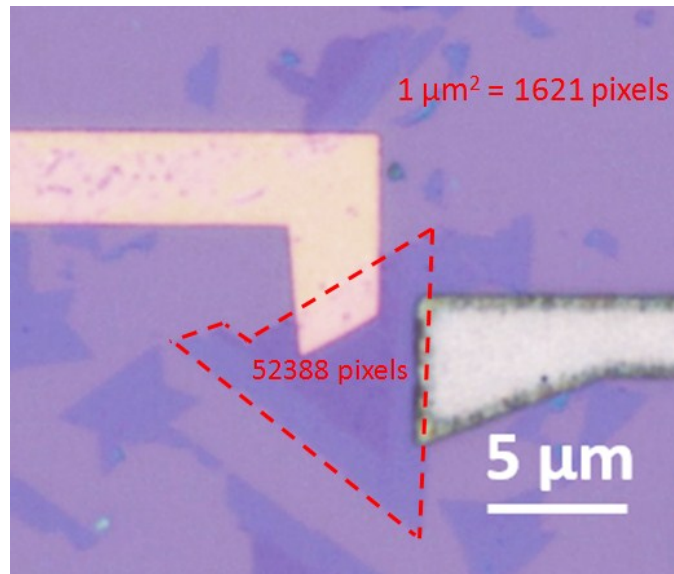

**Fig. S3.** Device actual area calculation from number of pixels in the optical microscopy image of the lateral structure.

### **Actual device area calculation**

The device area is determined using Adobe Photoshop to calculate the pixel size of the device shown in the optical microscopy image. As indicated in Fig. S3, the size of a  $1\ \mu\text{m}^2$  area is 1621 pixels. The triangular  $\text{WSe}_2\text{-MoS}_2$  lateral heterostructure consists of 52388 pixels. Therefore, the actual device area is calculated to be  $\sim 32\ \mu\text{m}^2$ .
